# Supplementary material for: Assessment of the Degradation Potential and Genomic Insights towards Phenanthrene by Dietzia psychralcaliphila JI1D
Source: MDPI journal article supplement (doi:10.3390/microorganisms9061327), 2021-06-19
Supplement: s1 [file s1]

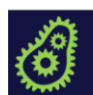

## Supplementary Material

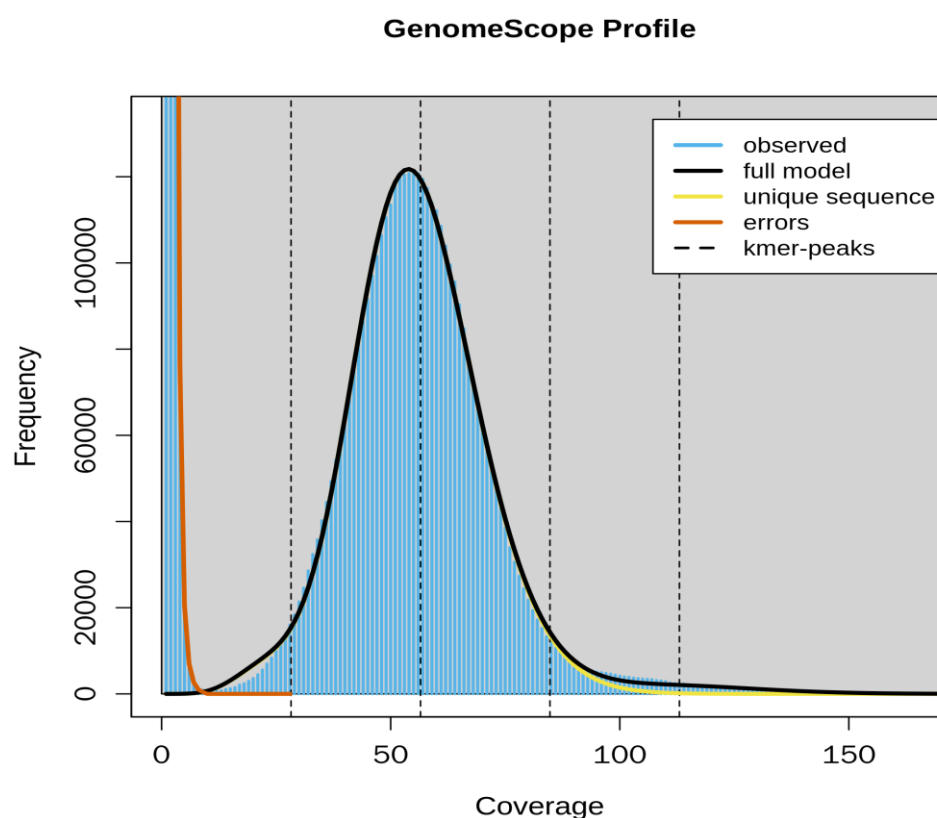

**Figure S1.** Genome scope profile of k-mer analysis of the genome.

**Table 1.** k-mer results.

| Content | K-mer coverage | Heterozygosity | Genome length | Genome Repeat length |
|---------|----------------|----------------|---------------|----------------------|
| 2lmer   | 56.5           | 0.11           | 4,269,056     | 242,866              |

**Table S2.** BUSCO assessments data.

| Status                              | # of BUSCOs | Percentage (%) |
|-------------------------------------|-------------|----------------|
| Complete and single-copy BUSCOs (S) | 141         | 95.27          |
| Complete and duplicated BUSCOs (D)  | 0           | 0              |
| Fragmented BUSCOs (F)               | 1           | 0.68           |
| Missing BUSCOs (M)                  | 6           | 4.05           |
| Total BUSCO groups searched         | 148         | 100            |

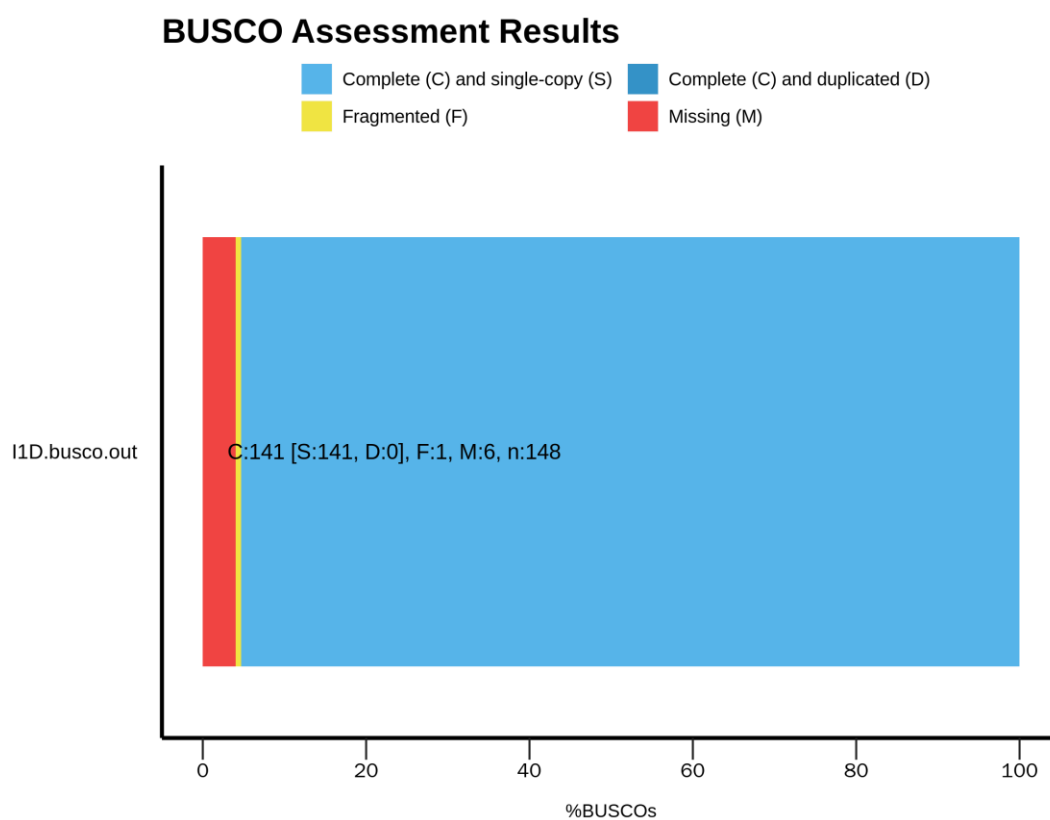

**Figure S2.** BUSCO result plot of the genome.

**Table S3.** Overall mapping statistics.

| Library name | Total reads | Mapped reads | Mapped reads (%) | Coverage (%) | Depth |
|--------------|-------------|--------------|------------------|--------------|-------|
| J11D         | 2,071,944   | 2,065,009    | 99.67            | 100.00       | 70.94 |

**Table S4.** Number of A, T, G, C, N nucleotides present in whole genome sequence.

| Number of A | Number of T | Number of G | Number of C | Number of N | GC contents |
|-------------|-------------|-------------|-------------|-------------|-------------|
| 644,045     | 648,162     | 1,477,068   | 1,447,109   | 96          | 69.3%       |

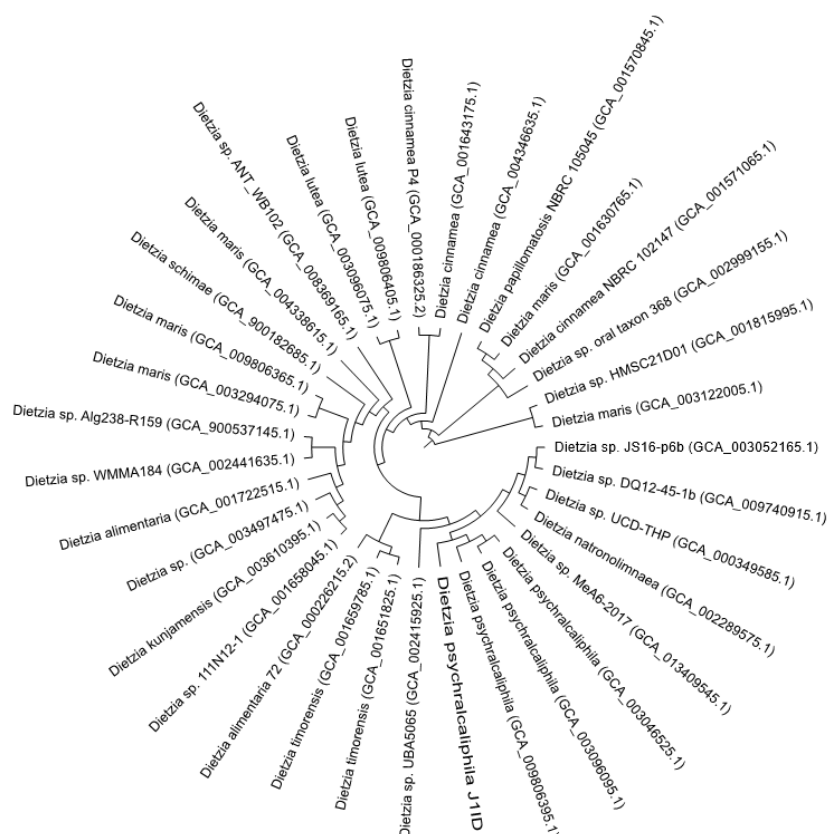

**Figure S3.** SCG analysis of the strain *D. psychracaliphila* J11D.

**Table S5.** Contents of COGs present in *D. psychralcaliphila* JI1D.

| COG Categories                                                    | Number of COGs | % COGs   |
|-------------------------------------------------------------------|----------------|----------|
| (J) Translation, ribosomal structure, and biogenesis              | 173            | 4.596174 |
| (A) RNA processing and modification                               | 2              | 0.053135 |
| (K) Transcription                                                 | 329            | 8.740701 |
| (L) Replication, recombination, and repair                        | 236            | 6.269926 |
| (B) Chromatin structure and dynamics                              | 2              | 0.053135 |
| (D) Cell cycle control, cell division, chromosome partitioning    | 54             | 1.434644 |
| (V) Defense mechanisms                                            | 73             | 1.939426 |
| (T) Signal transduction mechanisms                                | 116            | 3.081828 |
| (M) Cell wall/membrane/envelope biogenesis                        | 161            | 4.277365 |
| (N) Cell motility                                                 | 18             | 0.478215 |
| (Z) Cytoskeleton                                                  | 1              | 0.026567 |
| (U) Intracellular trafficking, secretion, and vesicular transport | 54             | 1.434644 |
| (O) Posttranslational modification, protein turnover, chaperones  | 104            | 2.763018 |
| (C) Energy production and conversion                              | 257            | 6.827843 |
| (G) Carbohydrate transport and metabolism                         | 164            | 4.357067 |
| (E) Amino acid transport and metabolism                           | 310            | 8.235919 |
| (F) Nucleotide transport and metabolism                           | 79             | 2.098831 |
| (H) Coenzyme transport and metabolism                             | 146            | 3.878852 |
| (I) Lipid transport and metabolism                                | 357            | 9.484591 |
| (P) Inorganic ion transport and metabolism                        | 264            | 7.013815 |
| (Q) Secondary metabolites biosynthesis, transport and catabolism  | 228            | 6.057386 |
| (S) Function unknown                                              | 636            | 16.89692 |

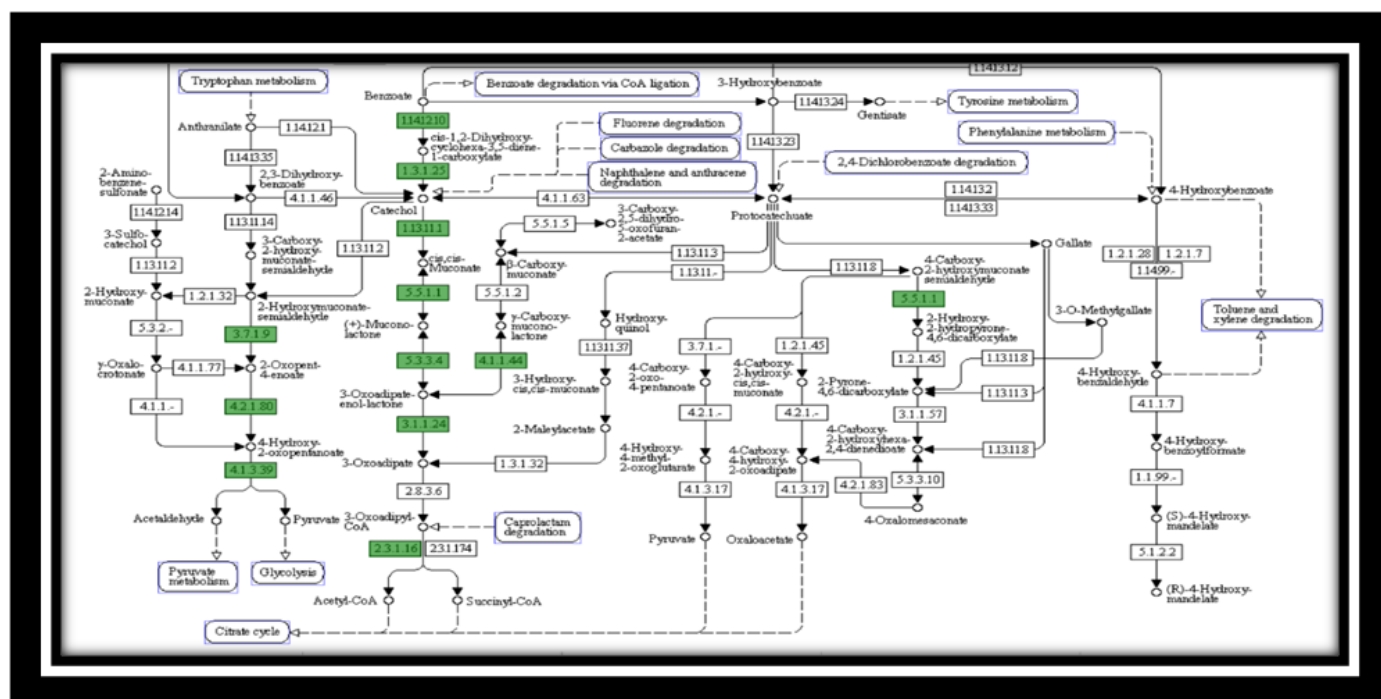

**Figure S4.** The complete genetic machinery present in the process of benzoate degradation obtained from RAST server. The genes encoded in the green colour boxes are found present in the whole genome analysis.

**Table S6.** Genes involved in aromatic compounds degradation.

| S.No                                            | Gene Name         | EC number  | Name                                                         |
|-------------------------------------------------|-------------------|------------|--------------------------------------------------------------|
| <b>n-Phenylalkanoic acid degradation</b>        |                   |            |                                                              |
| 1                                               | I1d_rast.CDS.1258 | 2.3.1.16   | 3-ketoacyl-CoA thiolase                                      |
| 2                                               | I1d_rast.CDS.797  | 4.2.1.17   | Enoyl-CoA hydratase                                          |
| 3                                               | I1d_rast.CDS.381  | 6.2.1.3    | Long chain fatty acid CoA ligase                             |
| 4                                               | I1d_rast.CDS.511  | 1.1.1.35   | 3-hydroxyacyl-CoA dehydrogenase                              |
| 5                                               | I1d_rast.DS.3324  | 1.14.13.-  | Vanilate O-demethylase oxidoreductase                        |
| <b>Benzoate Degradation</b>                     |                   |            |                                                              |
| 6                                               | I1D.rast.CDS.2910 | 1.3.1.25   | 1,2-dihydroxycyclohexa-3,5-diene-1-carboxylate dehydrogenase |
| 7                                               | I1D.rast.CDS.1302 | 1.14.12.10 | Benzoate 1,2-dioxygenase alpha subunit                       |
| 8                                               | I1D.rast.CDS.1303 | 1.14.12.10 | Benzoate 1,2-dioxygenase beta subunit                        |
| 9                                               | I1D.rast.CDS.2906 |            | Benzoate transporter protein                                 |
| 10                                              | I1D.rast.CDS.2909 | BenK       | Benzoate MFS transporter                                     |
| 11                                              | I1D.rast.CDS.2394 | 3.7.1.-    | 2-hydroxy-6-oxo-6-phenylhexa-2,4-dienoate hydrolase          |
| 12                                              | I1D.rast.CDS.2140 | 1.2.1.10   | Acetaldehyde dehydrogenase                                   |
| 13                                              | I1D.rast.CDS.216  | 3.1.1.24   | Beta-ketoadipate enol-lactone hydrolase                      |
| <b>Quinate degradation</b>                      |                   |            |                                                              |
| 14                                              | I1D.rast.CDS.175  | 4.2.1.10   | 3-dehydroquinate dehydratase                                 |
| 15                                              | I1D.rast.CDS.1713 | 1.14.13.-  | Baeyer Villiger monooxygenase                                |
| 16                                              | I1D.rast.CDS.1297 | 4.2.-.-    | 2-oxo-hepta-3-ene-1,7-dioic acid hydrates                    |
| 17                                              | I1D.rast.CDS.1616 | 4.2.1.18   | Methylglutaconyl-CoA hydratase                               |
| 18                                              | I1D.rast.CDS.955  | 2.7.1.71   | Shikimate kinase I                                           |
| <b>Metabolism of Central aromatic compounds</b> |                   |            |                                                              |
| 19                                              | I1D.rast.CDS.1296 | 4.1.2.-    | 2,4-dihydroxyhept-2-ene-1,7-dioic acid aldolase              |
| 20                                              | I1D.rast.CDS.1298 | 3.7.1.9    | 2-hydroxymuconic semialdehyde hydrolase                      |

| Catechol branch of beta ketoadipate pathway        |                   |              |                                                          |
|----------------------------------------------------|-------------------|--------------|----------------------------------------------------------|
| 21                                                 | I1D.rast.CDS.216  | 3.1.1.24     | Beta-ketoadipate enol-lactone hydrolase                  |
| 22                                                 | I1D.rast.CDS.2914 | 1.13.11.1    | Catechol 1,2-dioxygenase                                 |
| 23                                                 | I1D.rast.CDS.2915 | 5.5.1.1      | Muconate cycloisomerase                                  |
| 24                                                 | I1D.rast.CDS.2916 | 5.3.3.4      | Muconolactone isomerase                                  |
| 25                                                 | I1D.rast.CDS.1507 | 2.8.3.5      | Succinyl-CoA:3-ketoacid coenzyme A transferase subunit A |
| 26                                                 | I1D.rast.CDS.1506 | 2.8.3.5      | Succinyl-CoA:3-ketoacid coenzyme A transferase subunit B |
| Homogentisate pathway                              |                   |              |                                                          |
| 27                                                 | I1D.rast.CDS.784  | IcI R family | Transcriptional regulator                                |
| Protocatechuate branch of beta-ketoadipate pathway |                   |              |                                                          |
| 28                                                 | I1D.rast.CDS.75   | 4.1.1.44     | 4-carboxymuconolactone decarboxylase                     |
| 29                                                 | I1D.rast.CDS.2918 | PcaR         | Pca regulon regulatory protein                           |

Table S7. The legend for Figure 10.

| Compounds | Genes involved                                                                       | Compound name                                     |
|-----------|--------------------------------------------------------------------------------------|---------------------------------------------------|
| A         | NA                                                                                   | Phenanthrene                                      |
| B (I)     | DOCFNAII_02907, DOCFNAII_01294,<br>DOCFNAII_01236, DOCFNAII_02906,<br>DOCFNAII_01295 | Cis-3,4-Dihydroxy-3,4-dihydrophenanthrene         |
| C (II)    | DOCFNAII_00095, DOCFNAII_00124                                                       | 3,4-Dihydroxyphenanthrene                         |
| D (III)   | DOCFNAII_02135                                                                       | 2-Hydroxy-2H-benzo[h]chromene-2-carboxylate       |
| E (IV)    | DOCFNAII_00917, DOCFNAII_03808                                                       | Cis-4-(1'-Hydroxy-naphth-2'-yl)-2-oxobut-3-enoate |
| F (V)     | DOCFNAII_03745                                                                       | 1-Hydroxy-2-naphthaldehyde                        |
| G (VI)    | DOCFNAII_03312                                                                       | 1-Hydroxy-2-naphthoate                            |
| H (VII)   | DOCFNAII_03142, DOCFNAII_02814                                                       | Cis-2'-Carboxybenzalpyruvate                      |
| I (VIII)  | DOCFNAII_00143, DOCFNAII_03745                                                       | 2-Carboxybenzaldehyde                             |
| J (IX)    | DOCFNAII_01122, DOCFNAII_01146                                                       | Phthalate                                         |
| K (X)     | DOCFNAII_02907                                                                       | Phthalate-4,5-cis-dihydrodiol                     |
| L (XI)    | DOCFNAII_03730                                                                       | 4,5-Dihydroxyphthalate                            |
| M (XII)   | DOCFNAII_02859                                                                       | 3,4-Dihydroxybenzoate                             |
| N (XIII)  | DOCFNAII_02881, DOCFNAII_03605                                                       | 4-Carboxy-2-hydroxymuconate semialdehyde          |
| O (XIV)   | DOCFNAII_02907, DOCFNAII_01294                                                       | 1,2-Dihydroxynaphthoate                           |
| P (XV)    | DOCFNAII_03360                                                                       | Cis-1,2-Dihydroxy-1,2-dihydronaphthalene          |
| Q (XVI)   | DOCFNAII_02135                                                                       | 1,2-Dihydroxynaphthalene                          |
| R (XVII)  | DOCFNAII_00917                                                                       | 2-Hydroxychromene-2-carboxylate                   |
| S (XVIII) | DOCFNAII_03745                                                                       | Trans-o-Hydroxy-benzylidene pyruvate              |
| T (XIX)   | DOCFNAII_02167                                                                       | Salicylaldehyde                                   |
| U (XX)    | DOCFNAII_02881, DOCFNAII_02482                                                       | Salicylate                                        |
| V         | NA                                                                                   | Catechol                                          |
